# Supplementary material for: Nanotube brushes: polystyrene grafted covalently on CNx nanotubes by nitroxide-mediated radical polymerization
Source: Royal Society of Chemistry journal article supplement (doi:10.1039/b510471h), 2005-01-01
Supplement: b510471h.pdf [file b510471h.pdf]

## Nanotube Brushes: Polystyrene grafted covalently on CN<sub>x</sub> Nanotubes by nitroxide-mediated radical polymerization

M. Dehonor, K. Masenelli-Varlot, A. González-Montiel, C. Gauthier, J.Y. Cavallé,  
H. Terrones and M. Terrones

Table A. Relative elemental compositions measured by high energy loss EELS of i) MWNT, ii) CN<sub>x</sub>, iii) CN<sub>x</sub> functionalized by radicals (CN<sub>x</sub>-BPO/TEMPO) and iv) polystyrene-grafted carbon nanotubes (PS-CN<sub>x</sub>).

| Sample <sup>o</sup>                  | N/C   | + -    | O/C   | + -    |
|--------------------------------------|-------|--------|-------|--------|
| MWNT*                                | 0.006 | 0.0016 | 0.002 | 0.0016 |
| CN <sub>x</sub>                      | 0.016 | 0.0060 | 0.025 | 0.0135 |
| CN <sub>x</sub> -BPO/NO <sub>x</sub> | 0.020 | 0.0023 | 0.027 | 0.0023 |
| PS-CN <sub>x</sub>                   | 0.026 | 0.0060 | 0.011 | 0.0047 |

<sup>o</sup> All the samples were prepared by dispersion in ethanol or xylene using ultrasonication.

\* Multiwall carbon nanotubes without N-doping.

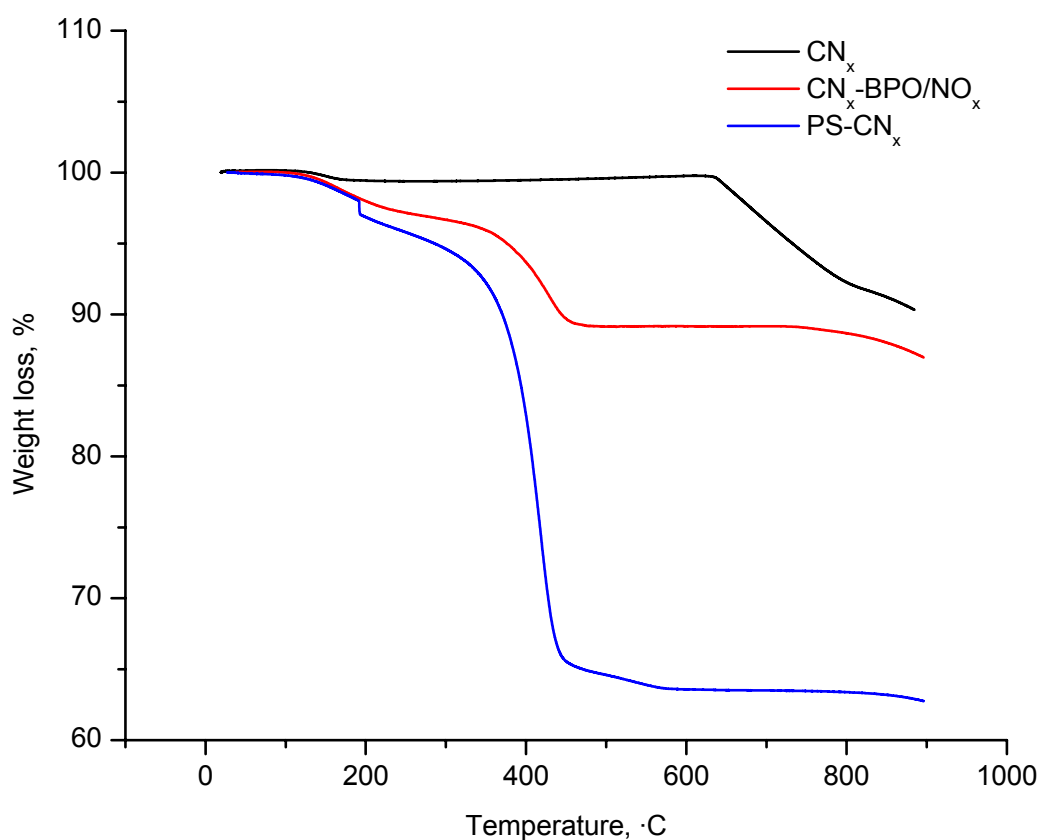

Fig. Comparative thermograms of (a) CN<sub>x</sub>, (b) CN<sub>x</sub>-BPO/NO<sub>x</sub> (PR CGX 505) and (c) PS-CN<sub>x</sub>.

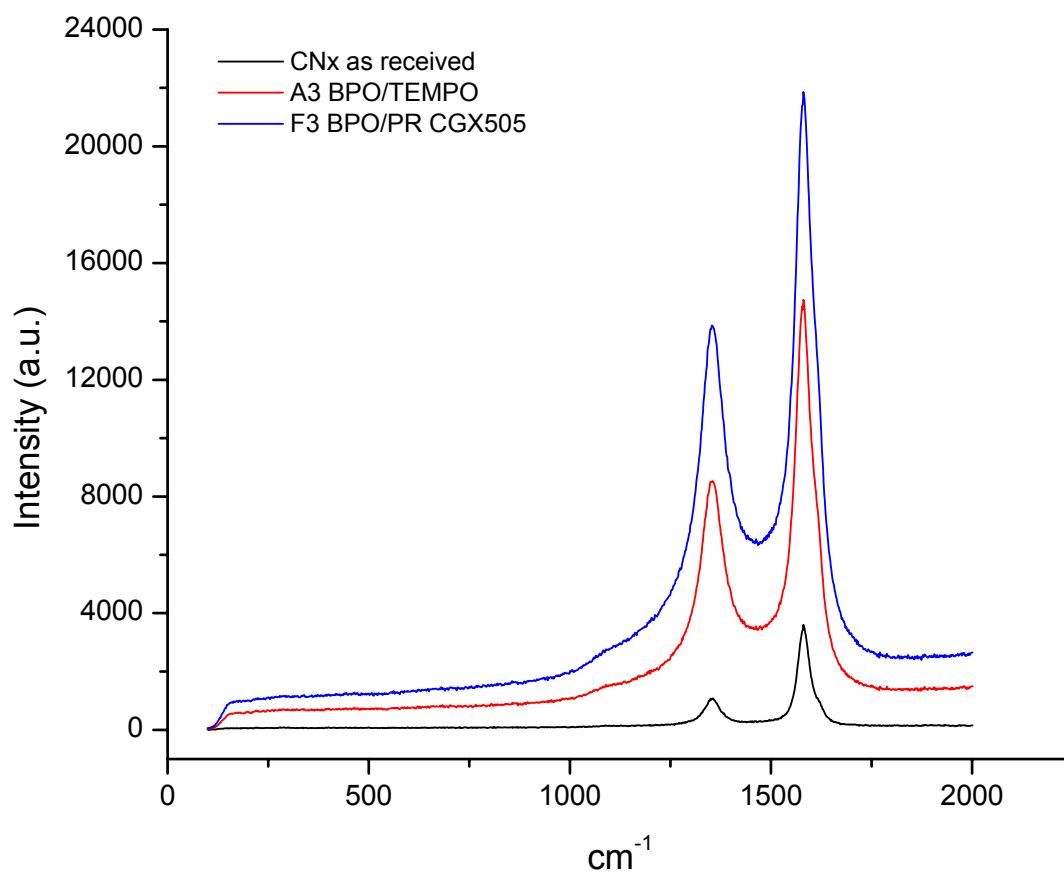

Fig. Comparative Raman spectra of radical functionalized CN<sub>x</sub> using BPO and several nitroxides: (a) CN<sub>x</sub> as received, (b) CN<sub>x</sub>-BPO/TEMPO and (c) CN<sub>x</sub>-BPO/PR CGX505.
